# Supplementary material for: Trusting the hand that feeds: microbes evolve to anticipate a serial transfer protocol as individuals or collectives
Source: PubMed Central journal article supplement (PMC6829849; doi:10.1186/s12862-019-1512-2), 2019-11-04

# Supplementary materials - S1: Evolution of Virtual Microbes wild types

## Convergent and divergent evolution in Virtual Microbe wild types

In the evolution of our WT's we observed strong convergence as well as divergence in the metabolic and gene regulatory networks that evolved. Because the evolved populations consist of a rich mix of different genotypes, we here describe the WT's by profiling the gene repertoires and GRNs at the end of the simulation ( $\sim 10,000$  generations). For this, we took 20 (maximally unrelated) individuals from the evolved populations and determined the consensus metabolism (Figure S1A). While there is some diversity in the metabolic networks across WT's, the shared gene repertoire constitutes a metabolic network that forms a metabolic cycle complemented with resource importers and an exporter for the C metabolite (Figure S1B). We observed that the discovery of both the metabolic cycle as well as the exporter favour survival, as it coincides with an increase in population size and a decrease in the number of generations per time step (Figure S4). Note that in Virtual Microbes survival is improved by avoiding toxic effects of high metabolite concentrations and by only investing in growth when conditions are favourable for growth. The latter can be done via gene regulatory networks that respond to the quality of the environment, but we also found forms of metabolic regulation where microbes accurately fine-tuned kinetic parameters to automatically maintain homeostasis.

Although the shared gene repertoire from Figure S1B does not contain transcription factors (TFs), all of the 16 WT's have at least one type of TF. These TFs can constitutively repress or activate certain genes, or can respond to environmental conditions by binding to a ligand molecule. The latter response depends on the kinetic properties of the TFs and the properties of the genes which they regulate, all of which are evolvable (see Table S1). To get a better overview of how the WT's respond to environmental stimuli we therefore chose to directly measure the gene expression levels in a variety of different resource concentrations (displayed for 6 WT's in Figure S2). On the level of these GRNs, and their sensitivity to the environment, we clearly see signs of strong divergent evolution. Note however, that the *effect* on the importer and exporter proteins seems very similar between WT's with different networks, showing that similar responses can be encoded by different GRNs. Finally, as seen in these graphs, some WT's have no response to environmental stimuli. We found that these non-regulating WT's are equally "fit", in that they have the same rates of building block production and death rates (see Figure S3). However, the majority (11/16) WT's evolved clear regulatory mechanisms.

In short, during the *de novo* evolution of Virtual Microbe WT's, some evolved features seem highly predictable. Namely, all have evolved the metabolic cycle, all express both resource importer proteins, and all but one WT have a C-exporter. On

the other hand, regulatory mechanisms and some of the secondary reactions display considerable diversity. Note that this divergence cannot be explained by differences in initial conditions or fluctuations in resource concentrations, because the WTs only differ with respect to the mutations that have happened in their evolutionary history. However, as shown in the main text, these differences have a profound effect on further evolution.

**Table S1 - Important parameters for TFs for an environmental response**

| Property TF      | Description                                                                                                                                                                                                                                 |
|------------------|---------------------------------------------------------------------------------------------------------------------------------------------------------------------------------------------------------------------------------------------|
| Expression TF    | The TF itself needs to be sufficiently expressed                                                                                                                                                                                            |
| Binding motif    | The binary binding motif (10 bits) must have a sufficient match to the operator sequences of genes (50 bits) in order to affect their expression                                                                                            |
| $K_{ligand}$     | If the binding constant to the ligand $K_{ligand}$ is not in range of the observed concentration of metabolites, the TF will always have the same (up or down) regulatory effect, regardless of the environment or internal concentrations. |
| Effect of ligand | The ligand-bound and ligand-unbound regulatory effects of TFs need to be different to effectively change expression of genes given any environmental stimulus                                                                               |

**Table S2 - Anticipation and polymorphisms are also observed when changing in the serial transfer protocol** For different transfer times, dilutions, and resources concentrations, seven WT<sub>s</sub> (11-16, and WT07 from Figure ?? from the main text) have been tested for the anticipation effect and polymorphisms. Note that anticipation is not tested by prolonging the cycle (like in the main text), but by comparing the patterns in cell cycle dynamics with those from Figure 3 in the main text. If a clear decrease in cell volume was observed at the end of the cycle, it was scored as anticipation. Polymorphisms are scored as defined in the methods.

textbf

| WT | Anticipation (Yes/No) | Polymorph (Yes,No,Quasi) |
|----|-----------------------|--------------------------|
| 11 | Y                     | N                        |
| 12 | Y                     | N                        |
| 13 | Y                     | Q                        |
| 14 | Y                     | N                        |
| 15 | Y                     | Q                        |
| 16 | Y                     | Q                        |
| 07 | Y                     | N                        |

textbf

| WT | Anticipation (Yes/No) | Polymorph (Yes,No,Quasi) |
|----|-----------------------|--------------------------|
| 11 | Y                     | N                        |
| 12 | Y                     | N                        |
| 13 | Y                     | Y                        |
| 14 | Y                     | N                        |
| 15 | Y                     | N                        |
| 16 | Y                     | Q                        |
| 07 | Y                     | N                        |

## Supplementary materials - S2: Virtual Microbe configuration

The evolution of these WT's was done with Virtual Microbes version 0.1.4 which is publicly available as a Python package. Complete documentation on the methods is publicly available on <http://bitbucket.org/thocu/virtualmicrobes>. For this study, we used the configuration below. We removed options that are not relevant for reproducibility (*e.g.* memory-limit, thread-count, data-storage-frequency etc.) or are default (*e.g.* universal-mutation-rate scaling=1.0) To reproduce these results with the newer versions of Virtual Microbes (0.2.4 as of January 2019), feel free to contact the corresponding author if help is required.

```
virtualmicrobes.py @reggen.cfg - evo @reg-evo.cfg --name My_WT_Vmicrobe
```

general\_options.cfg:

```
--base-death-rate 0.01
--mutation-rates
chrom_dup=0.0
chrom_del=0.0
chrom_fiss=0.0
chrom_fuse=0.0
point_mutation=0.005
tandem_dup=0.005
stretch_del=0.005
stretch_invert=0.005
stretch_translocate=0.005
stretch_exp_lambda=0.3
external_hgt=0.0002
internal_hgt=0.002
regulatory_mutation=0.005
reg_stretch_exp_lambda=0.1
--point-mutation-ratios
ligand_class=0.1
exporting=0.1
--rand-gene-params
base=10
lower=-1.0
upper=1.0
--mutation-param-space
base=10
lower=-0.5
upper=0.5
min=0.01
max=10.
--max-historic-max 0.1
--growth-rate-scaling 1
--competition-scaling 1
--selection-pressure historic_window_scaled
--historic-production-window 1000
--scale-prod-hist-to-pop
--small-mol-diff-const 0.02
--prot-degr-const 0.7
--transporter-membrane-occupancy .1
--influx-range
base=10
lower=-1.0
upper=-5.0
--fluctuate-frequencies 0,0.01
--init-external-conc 0.
--small-mol-ext-degr-const 1e-2
--bb-ext-degr-const 1e-1
--ene-ext-degr-const 5e-1
--transcription-cost 0.002
--energy-transcription-scaling 0.01
--spill-conc-factor 1.
--v-max-growth 1
--min-bind-score 0.85
--per-grid-cell-volume 8
--enzyme-volume-occupancy 3
--grid-sub-div row=2,col=2
--sub-env-part-influx 1.0
--grid-cols 40
--grid-rows 40
```

evosim\_options.cfg:

```
--duration 1000000
--env-rand-seed 87
--reproduce-size-proportional
```

```
--cell-init-volume 1.5
--cell-growth-rate 2.0
--cell-shrink-rate 0.6
--cell-growth-cost 0.2
--cell-division-volume 2.
--init-prot-mol-conc .1
--max-cell-volume 5
--nr-resource-classes 3
--nr-energy-classes 1
--ene-energy-range 1,1
--res-energy-range 2,10
--nr-building-blocks 1
--building-block-stois 1,1
--nr-cell-building-blocks 1
--mol-per-ene-class 1
--mol-per-res-class 1
--nr-cat-reactions 3
--nr-ana-reactions 3
--max-nr-cat-products 2
--min-cat-energy 1,3
--max-nr-ana-products 1
--nr-ana-reactants 2
--chromosome-compositions tf=0,enz=1,pump=1
--binding-seq-len 10
--operator-seq-len 50
--prioritize-influxed-metabolism
--init-prot-mol-conc 0.01
--degradation-variance-shape 100
--no-toxicity-variance-shape
--toxicity 0.2
--toxic-building-blocks
--toxicity-scaling 1000
--tf-binding-cooperativity 2
--homeostatic-bb-scaling 1
--high-energy-bbs
--prioritize-energy-rich-influx
```



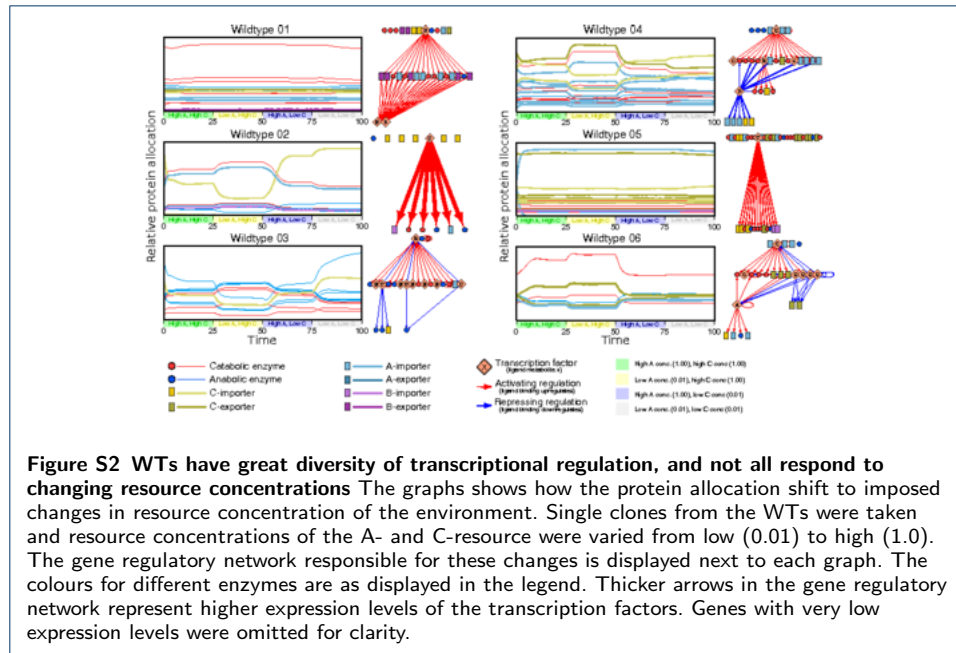

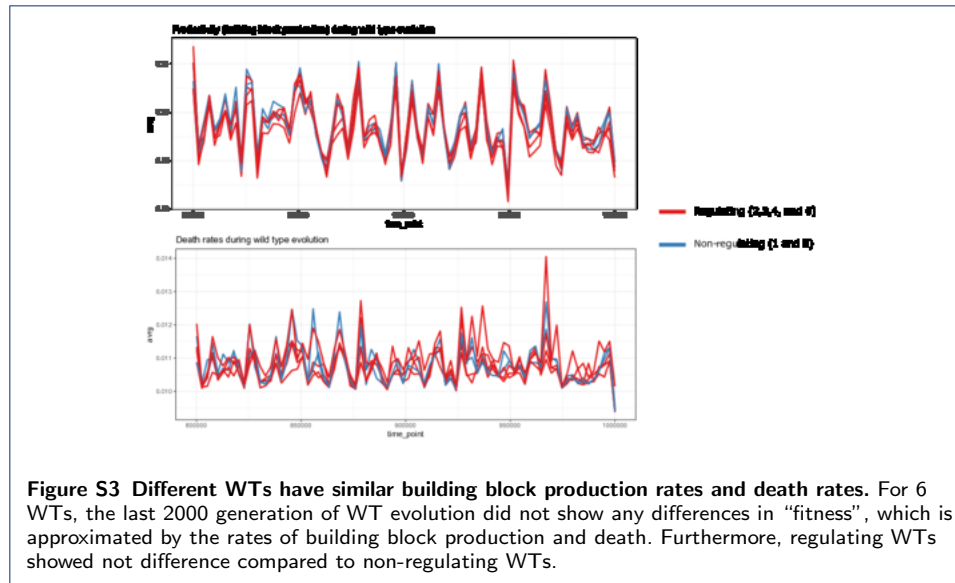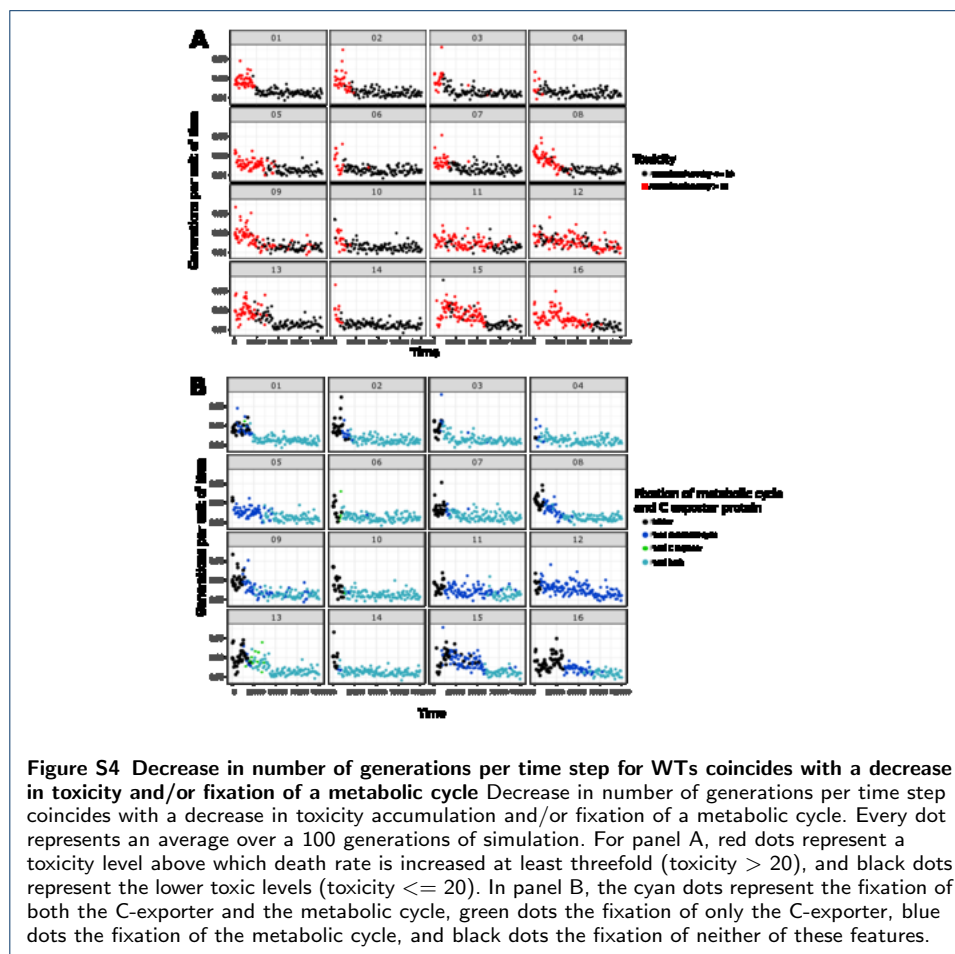



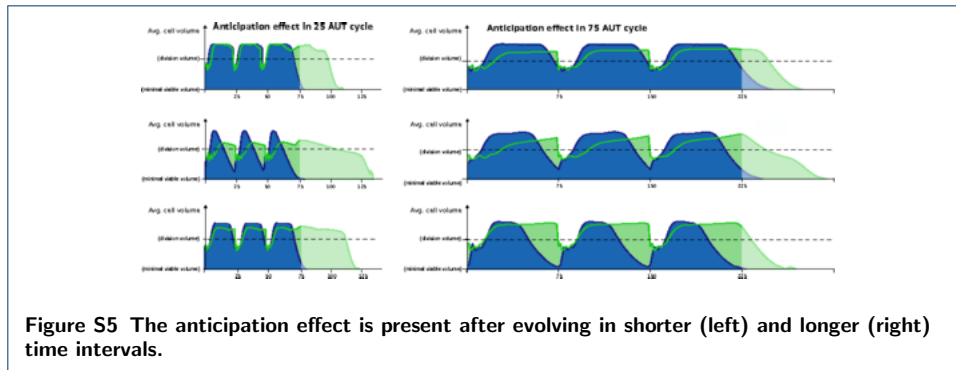

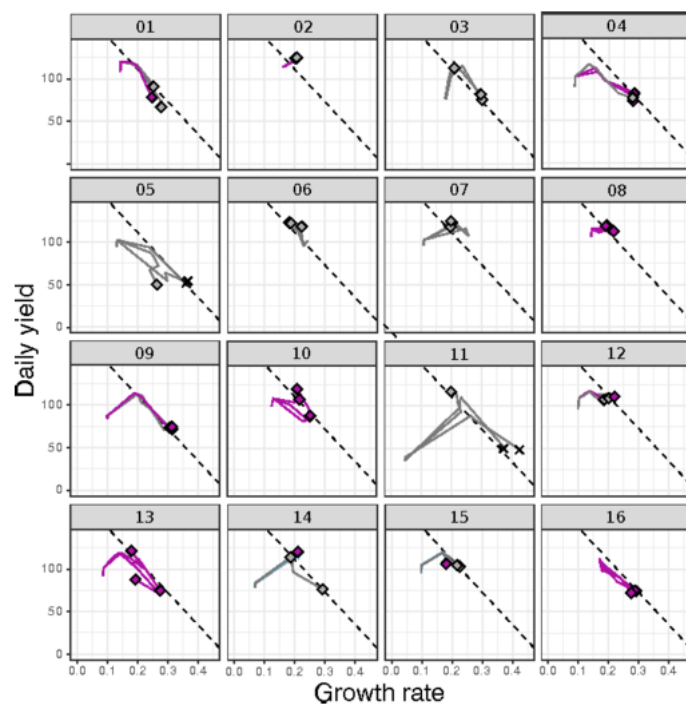

**Figure S6** Three replicate serial transfer experiments for all 16 WT. This image is shows all the data from the examples from Figure ??.

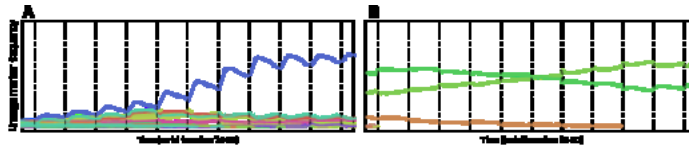

**Figure S7 Dynamics of different invading mutants** A) Neutral lineage markers linked to mutations which cause high growth rates but poor survival increase in frequency early, but are losing in frequency during stationary phase. B) Neutral lineage markers linked to mutations that have higher growth rates without trading off against survival show no such temporal fitness effect.

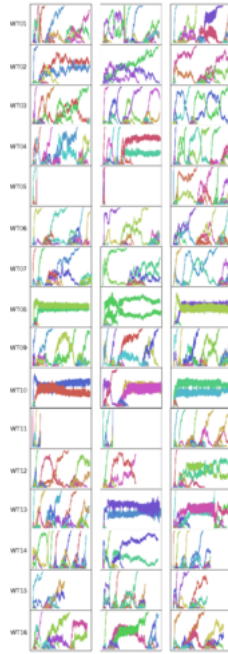

**Figure S8 Dynamics of lineage markers in all simulations** The neutral lineage markers for all 3 replicates of all WTs is shown, from which the coexistence was inferred (see methods).

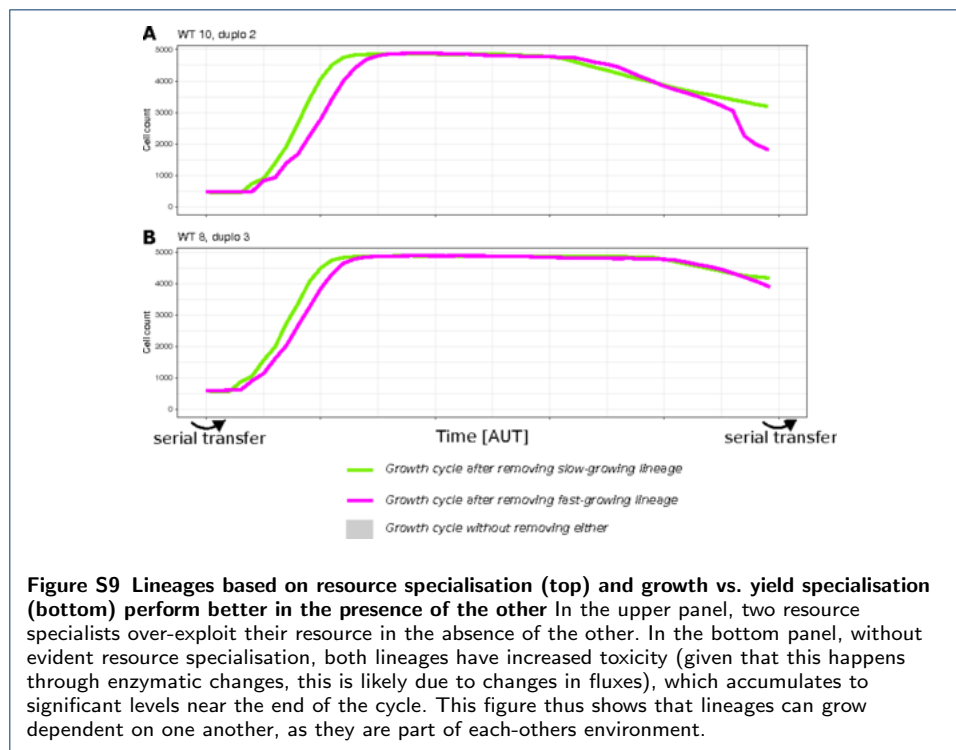

Supplement: 12862_2019_1512_MOESM1_ESM.pdf [file 12862_2019_1512_MOESM1_ESM.pdf]
